# Supplementary material for: Iron Age plant subsistence in the Inner Congo Basin (DR Congo)
Source: Springer Nature journal article supplement (doi:10.1007/s00334-021-00865-8), 2022-01-31
Supplement: MOESM2 [file 334_2021_865_MOESM2_ESM.pdf]

| Botany Sample ID | Site     | Context       | Depth below surface (cm) | Phase (Dominant Ceramic Component)        | Volume (litres) | Cenchrus americanus | cf. Cenchrus americanus | cf. Cenchrus americanus fragment/corroded | Vigna cf. unguiculata | Vigna cf. unguiculata, cotyledons | cf. Vigna, fragment | Small Fabaceae, cotyledon/fragment | Musanga cecropioides | cf. Musanga cecropioides, fragment | Nauclaea/Sarcocephalus type | Panicum indet., corroded | cf. Setaria/Brachiaria | Eleusine indica | Digitaria sp. | Cleome sp. | cf. Portulaca | Scleria sp. | Unidentified small seed | Parentchyma fragments, charred | Raphia endosperm fragments | Canarium schweinfurthii/cf. Canarium, fragments (g/l) | Elaeis guineensis /cf. Elaeis, fragments (g/l) | Charred food fragments | Unidentifiable small fragments | Copal                      | Radiocarbon dates associated | Radiocarbon Lab. Number |
|------------------|----------|---------------|--------------------------|-------------------------------------------|-----------------|---------------------|-------------------------|-------------------------------------------|-----------------------|-----------------------------------|---------------------|------------------------------------|----------------------|------------------------------------|-----------------------------|--------------------------|------------------------|-----------------|---------------|------------|---------------|-------------|-------------------------|--------------------------------|----------------------------|-------------------------------------------------------|------------------------------------------------|------------------------|--------------------------------|----------------------------|------------------------------|-------------------------|
| 363              | Bolondo  | BLD 16/1-34   | 0-8                      | Bolondo                                   | 10              |                     |                         |                                           |                       |                                   |                     |                                    |                      |                                    |                             |                          |                        |                 |               |            |               |             | 1                       |                                |                            | 0.05                                                  | 3                                              | p+                     | x                              |                            |                              |                         |
| 367              | Bolondo  | BLD 16/1-36   | 18-28                    | Bolondo                                   | 10              |                     |                         |                                           |                       |                                   |                     |                                    |                      |                                    |                             |                          |                        |                 |               |            |               |             |                         |                                |                            | 2.00                                                  | 11                                             | p+                     | x                              |                            |                              |                         |
| 369              | Bolondo  | BLD 16/1-37   | 30-42                    | Bolondo                                   | 10              |                     |                         | 9                                         |                       |                                   |                     |                                    |                      |                                    |                             |                          |                        |                 |               |            |               |             |                         |                                |                            | 1.06                                                  | 2                                              | p+                     | x                              |                            |                              |                         |
| 371              | Bolondo  | BLD 16/1-38   | 45-58                    | Bolondo                                   | 10              | 2                   | 6                       |                                           |                       |                                   |                     |                                    |                      |                                    |                             |                          |                        |                 |               |            |               |             | 1                       | 4                              |                            | 2.65                                                  | 53                                             | p+                     | x                              | 420 ± 30 BP                | Beta-469857                  |                         |
| 373              | Bolondo  | BLD 16/1-39   | 58-60                    | Bolondo                                   | 5               | 9                   | 84                      |                                           |                       |                                   |                     |                                    |                      |                                    |                             |                          |                        |                 |               |            |               |             |                         |                                |                            | 2.40                                                  | 13                                             | p+                     | x                              | 480 ± 30 BP                | Beta-469858                  |                         |
| 375              | Bolondo  | BLD 16/1-40   | 66-71                    | Bolondo                                   | 8               |                     |                         |                                           |                       |                                   |                     |                                    |                      |                                    |                             |                          |                        |                 |               |            |               |             |                         |                                |                            | 2.44                                                  | 90                                             | p+                     | x                              |                            |                              |                         |
| 377              | Bolondo  | BLD 16/1-41   | 71-80                    | Bolondo                                   | 10              |                     |                         | 1                                         |                       |                                   |                     |                                    |                      |                                    |                             |                          |                        |                 |               |            |               |             |                         |                                |                            | 3.04                                                  | 126                                            | p+                     | x                              |                            |                              |                         |
| 383              | Bolondo  | BLD 16/5-46   | 0-13                     | Ilemba-Bokonda                            | 10              |                     |                         |                                           |                       |                                   |                     |                                    |                      |                                    |                             |                          |                        |                 |               |            |               |             |                         |                                |                            | 0.26                                                  | 5                                              | p+                     | x                              |                            |                              |                         |
| 385              | Bolondo  | BLD 16/5-47   | 13-20                    | Bokone                                    | 10              |                     |                         |                                           |                       |                                   |                     |                                    |                      |                                    |                             |                          |                        |                 |               |            |               |             |                         |                                |                            | 0.53                                                  | 2                                              | p+                     | x                              |                            |                              |                         |
| 391              | Bolondo  | BLD 16/5-51   | 35-45                    | Bokone (+ earlier admixtures)             | 10              |                     |                         |                                           |                       |                                   |                     |                                    |                      |                                    |                             |                          |                        |                 |               |            |               |             |                         |                                |                            | 0.29                                                  | 1                                              | p+                     |                                |                            |                              |                         |
| 394              | Bolondo  | BLD 16/5-53   | 45-56                    | Bokone                                    | 10              |                     |                         |                                           |                       |                                   |                     |                                    |                      |                                    |                             |                          |                        |                 |               |            |               |             |                         |                                |                            | 1.40                                                  | 4                                              | p+                     | x                              |                            |                              |                         |
| 396              | Bolondo  | BLD 16/5-55   | 56-71                    | Bolondo                                   | 10              |                     |                         |                                           |                       |                                   |                     |                                    |                      |                                    |                             |                          |                        |                 |               |            |               |             |                         |                                |                            | 0.55                                                  | 3                                              | p+                     | x                              |                            |                              |                         |
| 398              | Bolondo  | BLD 16/5-57   | 71-75                    | Bolondo                                   | 8               |                     |                         |                                           |                       |                                   |                     |                                    |                      |                                    |                             |                          |                        |                 |               |            |               |             |                         |                                |                            | 0.75                                                  | 22                                             | p+                     |                                |                            |                              |                         |
| 400              | Bolondo  | BLD 16/5-59   | 75-86                    | Bolondo                                   | 10              | 1                   | 16                      |                                           |                       |                                   |                     |                                    |                      |                                    |                             |                          |                        |                 |               |            |               |             |                         |                                |                            | 0.10                                                  | 56                                             | p+                     |                                | 365 ± 30 BP                | Poz-98311                    |                         |
| 402              | Bolondo  | BLD 16/5-61   | 86-91                    | Bolondo                                   | 8               | 3                   |                         |                                           |                       |                                   |                     |                                    |                      |                                    |                             |                          |                        |                 |               |            |               |             |                         |                                |                            | 0.94                                                  | 85                                             | p+                     | x                              | 334 ± 30 BP                | Poz-98058                    |                         |
| 404              | Bolondo  | BLD 16/5-63   | 91-92                    | Bolondo                                   | 3               |                     |                         |                                           |                       |                                   |                     |                                    |                      |                                    |                             |                          |                        |                 |               |            |               |             |                         |                                |                            | 0.46                                                  | 23                                             | p+                     | x                              |                            |                              |                         |
| 406              | Bolondo  | BLD 16/5-65   | 92-94                    | Bolondo                                   | 2               |                     |                         |                                           |                       |                                   |                     |                                    |                      |                                    |                             |                          |                        |                 |               |            |               |             |                         |                                |                            | 0.16                                                  | 5                                              | p+                     |                                |                            |                              |                         |
| 408              | Bolondo  | BLD 16/5-67   | 94-96                    | Bolondo                                   | 2               |                     |                         |                                           |                       |                                   |                     |                                    |                      |                                    |                             |                          |                        |                 |               |            |               |             |                         |                                |                            |                                                       |                                                |                        |                                |                            |                              |                         |
| 410              | Bolondo  | BLD 16/5-69   | 96-98                    | Bolondo                                   | 2               |                     |                         |                                           |                       |                                   |                     |                                    |                      |                                    |                             |                          |                        |                 |               |            |               |             |                         |                                |                            |                                                       |                                                |                        |                                |                            |                              |                         |
| 412              | Bolondo  | BLD 16/5-71   | 98-102                   | Bolondo                                   | 4               |                     |                         |                                           |                       |                                   |                     |                                    |                      |                                    |                             |                          |                        |                 |               |            |               |             |                         |                                |                            |                                                       |                                                |                        |                                |                            |                              |                         |
| 414              | Bolondo  | BLD 16/5-72   | 102-123                  | Wema/Bolondo                              | 10              |                     |                         |                                           |                       |                                   |                     |                                    |                      |                                    |                             |                          |                        |                 |               |            |               |             |                         |                                |                            |                                                       | 1.90                                           | 11                     | p+                             | x                          |                              |                         |
| 416              | Bolondo  | BLD 16/5-74   | 123-125                  | Wema                                      | 2               |                     |                         |                                           |                       |                                   |                     |                                    |                      |                                    |                             |                          |                        |                 |               |            |               |             |                         |                                |                            | 2.56                                                  | 23                                             | p+                     | x                              | 410 ± 30 BP<br>460 ± 30 BP | Beta-447441<br>Poz-98264     |                         |
| 418              | Bolondo  | BLD 16/5-76   | 125-153                  | Wema                                      | 10              |                     |                         |                                           |                       |                                   |                     |                                    |                      |                                    |                             |                          |                        |                 |               |            |               |             |                         |                                |                            | 2.85                                                  | 2                                              | p+                     | x                              |                            |                              |                         |
|                  |          |               |                          |                                           |                 |                     |                         |                                           |                       |                                   |                     |                                    |                      |                                    |                             |                          |                        |                 |               |            |               |             |                         |                                |                            | 3.34                                                  | 36                                             | p+                     | x                              | 520 ± 30 BP                | Beta-447442                  |                         |
| 1                | Mbandaka | MBA 11/1-10   | 8-22                     | Mixed colluvium (Bondongo; Nkile; Bokele) | 10              |                     |                         |                                           |                       |                                   |                     | 29                                 | 1                    |                                    |                             |                          |                        |                 |               |            |               |             |                         |                                |                            | 0.45                                                  |                                                | p+                     |                                | 1660 ± 35 BP               | Poz-48986                    |                         |
| 2                | Mbandaka | MBA 11/1-22   | 12-25                    | Mixed colluvium (Bondongo; Nkile; Bokele) | 10              |                     |                         |                                           |                       |                                   |                     | 20                                 |                      |                                    |                             |                          |                        |                 |               |            |               |             |                         |                                |                            | 0.19                                                  |                                                | p+                     |                                | 605 ± 30 BP                | Poz-48992                    |                         |
| 3                | Mbandaka | MBA 11/1/1-31 | 18-24                    | Bokele                                    | 10              |                     |                         |                                           |                       |                                   |                     | 74                                 |                      |                                    |                             |                          |                        |                 |               |            | 19            |             |                         |                                |                            | 0.26                                                  |                                                | p+                     |                                | 1745 ± 35 BP               | Poz-48993                    |                         |
| 4                | Mbandaka | MBA 11/1/1-35 | 32-40                    | Bokele                                    | 10              |                     |                         |                                           |                       |                                   |                     | 53                                 |                      |                                    |                             |                          |                        |                 |               |            | 55            |             |                         |                                |                            | 0.36                                                  |                                                | p+                     |                                | 1835 ± 35 BP               | Poz-48995                    |                         |
| 5                | Mbandaka | MBA 11/1/2-42 | 29-34                    | Bondongo/Nkile                            | 10              | 3                   |                         |                                           |                       |                                   |                     | 51                                 |                      |                                    |                             |                          |                        |                 |               |            | 1             |             |                         |                                |                            | 0.15                                                  |                                                | p+                     |                                | 660 ± 30 BP<br>630 ± 30 BP | Poz-72477<br>Poz-72478       |                         |
| 6                | Mbandaka | MBA 11/1-47   | 0-25                     | Mixed colluvium (Bondongo; Nkile; Bokele) | 10              |                     |                         |                                           |                       |                                   |                     | 16                                 |                      |                                    |                             |                          |                        |                 |               |            |               | 3           |                         |                                |                            | 0.15                                                  |                                                | p+                     |                                | 470 ± 30 BP                | Poz-48996                    |                         |
| 31               | Iyonda   | IYO 12/1-20   | 30-43                    | Mixed (Imbonga?; Bokuma; contact finds)   | 10              |                     |                         |                                           |                       |                                   |                     |                                    |                      |                                    |                             |                          |                        |                 |               |            |               |             |                         |                                |                            |                                                       |                                                |                        |                                |                            |                              |                         |
| 32               | Iyonda   | IYO 12/1-23   | 44-51                    | Imbonga (+ slight Bokuma admixture + 1    | 10              |                     |                         |                                           |                       |                                   |                     |                                    |                      | 1                                  |                             |                          |                        |                 |               |            |               |             |                         |                                |                            | 0.020                                                 | 1.19                                           |                        | p+                             |                            |                              |                         |

ESM 2 Table 1, Detailed list of individual archaeobotany samples and 14C dates

|     |        |                |         |                                          |     |   |   |    |    |   |    |   |    |       |      |      |              |             |
|-----|--------|----------------|---------|------------------------------------------|-----|---|---|----|----|---|----|---|----|-------|------|------|--------------|-------------|
| 33  | lyonda | IYO 12/1/1-25  | 62–65   | Imbonga                                  | 10  | 1 |   |    |    |   | 53 | 1 | 21 | 0.070 | 1.32 | p+   | 2040 ± 60 BP | Poz-74815   |
|     |        |                |         |                                          |     |   |   |    |    |   |    |   |    |       |      |      | 2100 ± 30 BP | Poz-79307   |
| 34  | lyonda | IYO 12/1/1-27  | 69–82   | Imbonga                                  | 10  | 2 |   |    | 89 | 9 | 2  |   | 2  | 0.930 | 4.37 | p+   | 2180 ± 50 BP | Poz-74816   |
| 35  | lyonda | IYO 12/1/1-35  | 53–58   | Imbonga                                  | 10  |   |   |    | 10 | 3 | 1  |   |    | 0.170 | 0.50 | p+   |              |             |
| 36  | lyonda | IYO 12/1/1-36  | 67–88   | Imbonga                                  | 10  |   |   |    | 9  |   | 1  |   |    | 0.770 | 3.79 | p+   |              |             |
| 37  | lyonda | IYO 12/1/1-37  | 83–116  | Imbonga                                  | 10  |   |   |    | 1  |   | 2  | 1 | 2  | 0.310 | 0.93 | p+   | 2175 ± 30 BP | Poz-55342   |
|     |        |                |         |                                          |     |   |   |    |    |   |    |   |    |       |      |      | 2185 ± 30 BP | Poz-55343   |
|     |        |                |         |                                          |     |   |   |    |    |   |    |   |    |       |      |      | 2105 ± 30 BP | Poz-55344   |
|     |        |                |         |                                          |     |   |   |    |    |   |    |   |    |       |      |      | 2135 ± 30 BP | Poz-55345   |
| 70  | lyonda | IYO 15/1/3-9   | 28–38   | Botendo                                  | 2   |   |   |    |    |   |    |   | 8  |       | 0.23 | p+   | 40 ± 30 BP   | Poz-75080   |
|     |        |                |         |                                          |     |   |   |    |    |   |    |   |    |       |      |      | 115 ± 30 BP  | Poz-74880   |
| 88  | lyonda | IYO 15/1/6-17  | 75–81   | Mixed (Imbonga + Bokuma)                 | 5.5 |   |   | 1  |    |   |    |   |    |       | 2.12 | p+   | 2275 ± 30 BP | Poz-74884   |
|     |        |                |         |                                          |     |   |   |    |    |   |    |   |    |       |      |      | 2325 ± 35 BP | Poz-79304   |
|     |        |                |         |                                          |     |   |   |    |    |   |    |   |    |       |      |      | 1960 ± 40 BP | Poz-74817   |
| 92  | lyonda | IYO 15/1/6-33  | 88–102  | Mixed (Imbonga + Bokuma)                 | 10  | 2 |   |    |    |   |    |   |    | 0.004 | 1.22 | p+   | 2275 ± 30 BP | Poz-74884   |
|     |        |                |         |                                          |     |   |   |    |    |   |    |   |    |       |      |      | 2325 ± 35 BP | Poz-79304   |
|     |        |                |         |                                          |     |   |   |    |    |   |    |   |    |       |      |      | 1960 ± 40 BP | Poz-74817   |
| 100 | lyonda | IYO 15/1/6-64  | 69–78   | Mixed (Imbonga + Bokuma)                 | 4.5 | 1 |   |    |    |   |    |   |    | 0.001 | 1.71 | p+   | 1960 ± 40 BP | Poz-74817   |
| 105 | lyonda | IYO 15/1/6-73  | 92–107  | Mixed (Imbonga + Bokuma)                 | 10  | 8 | 6 | 36 | 66 | 1 |    |   |    |       | 0.75 | p+   | 2325 ± 35 BP | Poz-79304   |
| 113 | lyonda | IYO 15/1/7-18  | 67–85   | Imbonga                                  | 7   | 3 | 1 | 11 | 80 |   | 1  |   |    |       | 2.82 | p+   | 2290 ± 30 BP | Poz-74885   |
| 116 | lyonda | IYO 15/1/7-26  | 57–75   | Imbonga                                  | 10  |   |   |    |    |   |    |   | 27 | 0.019 | 0.32 | p+   | 2195 ± 30 BP | Poz-74886   |
| 131 | lyonda | IYO 15/1/9-38  | 89      | Imbonga                                  | 8   |   |   |    |    |   |    |   |    | 0.061 | 1.05 | p+   | 2140 ± 30 BP | Poz-74889   |
|     |        |                |         |                                          |     |   |   |    |    |   |    |   |    |       |      |      | 2120 ± 30 BP | Poz-74890   |
| 139 | lyonda | IYO 15/1/13-5  | 59–69   | Bokuma                                   | 10  |   |   |    |    |   |    |   |    |       | 0.77 | p x  | 1475 ± 30 BP | Poz-74893   |
|     |        |                |         |                                          |     |   |   |    |    |   |    |   |    |       |      |      | 1395 ± 30 BP | Poz-74894   |
| 141 | lyonda | IYO 15/1/13-6  | 59–69   | Bokuma                                   | nd  |   |   |    |    |   |    |   | 25 | 0.001 | 0.47 | p    | 1475 ± 30 BP | Poz-74893   |
|     |        |                |         |                                          |     |   |   |    |    |   |    |   |    |       |      |      | 1395 ± 30 BP | Poz-74894   |
| 524 | lyonda | IYO 15/1/7-41  | 58–66   | Imbonga                                  | nd  |   |   |    |    |   |    |   |    |       |      | p    | 2290 ± 30 BP | Poz-74885   |
|     |        |                |         |                                          |     |   |   |    |    |   |    |   |    |       |      |      | 2195 ± 30 BP | Poz-74886   |
| 204 | lyonda | IYO 15/2/4-128 | 117–128 | Imbonga                                  | 10  |   |   |    |    |   |    |   | 3  | 0.020 | 3.00 | p+   | 2200 ± 30 BP | Poz-74899   |
|     |        |                |         |                                          |     |   |   |    |    |   |    |   |    |       |      |      | 2180 ± 30 BP | Poz-74918   |
| 210 | lyonda | IYO 15/2/4-150 | 138–147 | Imbonga                                  | 10  |   |   |    |    |   |    |   | 8  |       | 0.10 | p+   | 2210 ± 30 BP | Poz-74979   |
|     |        |                |         |                                          |     |   |   |    |    |   |    |   |    |       |      |      | 2185 ± 30 BP | Poz-74919   |
| 238 | lyonda | IYO 15/2/4-245 | 250–263 | Imbonga                                  | 10  | 1 |   |    |    | 1 |    |   |    |       | 0.10 | p+   | 2040 ± 30 BP | Beta-441457 |
|     |        |                |         |                                          |     |   |   |    |    |   |    |   |    |       |      |      | 2110 ± 30 BP | Beta-441458 |
| 261 | lyonda | IYO 15/5-8     | 46–64   | Imbonga                                  | 10  |   |   |    |    |   |    |   |    | 0.030 | 3.18 | p+ x |              |             |
| 279 | lyonda | IYO 15/17/1-9  | 33–47   | Imbonga                                  | 10  |   |   |    |    |   |    |   |    |       | 1.07 | p+   |              |             |
| 293 | lyonda | IYO 15/19/6-51 | 15–50   | Ikenge                                   | 1   |   |   |    |    |   |    |   | 18 |       | 3.62 | p+ x | 150 ± 30 BP  | Poz-79289   |
| 297 | lyonda | IYO 15/19-43   | 10–14   | Mixed A-horizon (Bokuma; Botendo/Ikenge; | 10  |   |   | 1  |    |   |    |   | 24 |       | 0.74 | p+ x | 120 ± 30 BP  | Poz-79290   |
| 309 | lyonda | IYO 15/42/4-24 | 40–65   | Bokuma (+ slight Imbonga admixture)      | 10  |   |   |    | 3  |   |    |   |    |       | 2.40 | p x  | 2165 ± 30 BP | Poz-79291   |
| 313 | lyonda | IYO 15/48/1-1  | 21–32   | Botendo                                  | 0.7 |   |   |    | 6  |   |    |   | 1  |       | 0.07 | p+ x | 230 ± 30 BP  | Beta-428090 |
|     |        |                |         |                                          |     |   |   |    |    |   |    |   |    |       |      |      | 120 ± 30 BP  | Beta-428091 |
| 324 | lyonda | IYO 15/63/3-32 | 40–60   | Nkile                                    | 8   |   |   |    |    | 1 |    |   |    |       | 5.92 | p+   | 490 ± 30 BP  | Poz-79295   |
| 329 | lyonda | IYO 15/63/3-64 | 30–45   | Nkile                                    | 10  |   |   | 2  |    |   | 2  |   | 5  |       | 1.33 | p+   | 495 ± 30 BP  | Poz-79296   |
| 334 | lyonda | IYO 15/63/4-47 | 40–47   | Bondongo/Nkile                           | 10  |   |   |    | 4  |   |    | 1 | 3  |       | 5.29 | p+   | 545 ± 30 BP  | Poz-79297   |
| 343 | lyonda | IYO 15/63/5-67 | 22–35   | Imbonga                                  | nd  |   |   |    |    |   |    | 1 |    |       |      | p    | 535 ± 30 BP  | Poz-79298   |
| 354 | lyonda | IYO 15/65-3    | 15–24   | Botendo                                  | 10  |   |   |    |    |   |    |   | 1  | 9     | 4.05 | p+ x | 115 ± 30 BP  | Poz-79301   |
| 305 | lyonda | IYO 15/30/1-4  | 0–45    | Imbonga                                  | nd  |   |   |    |    |   |    | 1 | 1  |       | 2.00 | p    |              |             |
| 287 | lyonda | IYO 15/19/1-24 | 30–60   | Bondongo? (No ceramic finds.)            | 2   |   |   | 1  |    |   |    |   |    |       | 0.44 | p+   | 645 ± 30 BP  | Poz-79288   |
| 292 | lyonda | IYO 15/19/6-46 | 35–50   | Ikenge                                   | 0.2 |   |   |    |    |   |    |   | 4  |       | 0.35 | p+   | 150 ± 30 BP  | Poz-79289   |

|     |        |               |        |                                     |    |  |   |  |    |   |      |    |   |             |             |
|-----|--------|---------------|--------|-------------------------------------|----|--|---|--|----|---|------|----|---|-------------|-------------|
| 425 | lyonda | IYO 16/1/3-43 | 36-52  | Bokuma (+ slight Imbonga admixture) | 10 |  |   |  |    | 2 | 1.25 | p+ | x |             |             |
| 428 | lyonda | IYO 16/1/5-58 | 49-59  | Imbonga                             | 10 |  |   |  |    | 3 | 1.64 | p+ |   |             |             |
| 446 | lyonda | IYO 16/1/6-61 | 48-59  | Bokuma                              | 10 |  |   |  |    |   | 0.60 | p+ | x |             |             |
| 476 | lyonda | IYO 16/2      | 17-31  | Colluvium (Bondongo to modern)      | 10 |  |   |  | 9  |   | 1.63 | p+ |   |             |             |
| 484 | lyonda | IYO 16/5      | 17-32  | Colluvium (Bondongo to modern)      | 10 |  |   |  | 2  |   | 1.32 | p+ |   |             |             |
| 487 | lyonda | IYO 16/6      | 15-28  | Colluvium (Bondongo to modern)      | 10 |  |   |  | 25 |   | 0.72 | p+ |   |             |             |
| 491 | lyonda | IYO 16/7      | 17-29  | Colluvium (Bondongo to modern)      | 10 |  |   |  | 12 |   | 2.19 | p+ | x |             |             |
| 494 | lyonda | IYO 16/8      | 0-7    | Colluvium (Bondongo to modern)      | 10 |  |   |  |    | 5 | 1.38 | p+ |   |             |             |
| 497 | lyonda | IYO 16/9      | 11-23  | Colluvium (Bondongo to modern)      | 10 |  |   |  | 2  |   | 0.59 | p+ |   |             |             |
| 500 | lyonda | IYO 16/10     | 7-19   | Colluvium (no ceramic finds).       | 10 |  |   |  | 29 |   | 0.26 | p+ |   |             |             |
| 503 | lyonda | IYO 16/11     | 5-20   | Colluvium (no ceramic finds).       | 10 |  |   |  | 26 |   | 0.14 | p+ |   |             |             |
| 509 | lyonda | IYO 17/1-19   | 10-39  | Colluvium (Imbonga to modern)       | 10 |  |   |  | 3  |   | 2.24 | p+ |   | 950 ± 30 BP | Beta-529832 |
| 510 | lyonda | IYO 17/1-20   | 17-40  | Colluvium (Imbonga to modern)       | 10 |  |   |  | 28 |   | 1.52 | p+ | x | 950 ± 30 BP | Beta-529832 |
| 511 | lyonda | IYO 17/2/1-24 | 60-71  | Bokuma                              | 10 |  |   |  |    | 4 | 2.48 | p+ |   |             |             |
| 512 | lyonda | IYO 17/2/1-29 | 73-84  | Bokuma                              | 10 |  |   |  | 6  |   | 2.45 | p+ | x |             |             |
| 513 | lyonda | IYO 17/2/1-33 | 84-93  | Bokuma                              | 10 |  |   |  | 9  |   | 1.01 | p+ |   |             |             |
| 515 | lyonda | IYO 17/2/1-57 | 75-85  | Bokuma                              | 10 |  | 1 |  |    | 2 | 1.99 | p+ |   |             |             |
| 516 | lyonda | IYO 17/2/1-61 | 94-105 | Bokuma                              | 10 |  |   |  | 11 |   | 4.50 | p+ | x |             |             |

Katharina Neumann\*, Barbara Eichhorn<sup>†</sup>, Hans-Peter Wotzka, Iron Age plant subsistence in the Inner Congo Basin (DR Congo), Vegetation History and Archaeobotany,  
 \*Goethe University Frankfurt, Germany, Email: k.neumann@em.uni-frankfurt.de

**ESM 2 Table 2**, Metrical data of archaeological pearl millet caryopses from lyonda, Mbandaka, and Bolondo (in mm)

|                                       | Botanical sample ID | Length | Breadth | Thickness | L:B  | B:T  |
|---------------------------------------|---------------------|--------|---------|-----------|------|------|
| Bolondo 16/1-38, caryopsis 1 (dated)  | 371                 | 2.2    | 1.5     | 1.3       | 1.47 | 1.15 |
| Bolondo 16/1-38, caryopsis 2          | 371                 | 1.8    | 1.4     | 1.2       | 1.29 | 1.17 |
| Bolondo 16/1-39, caryopsis 1 (dated)  | 373                 | 2.0+   | 1.3     | 1.2       | ~1.5 | 1.08 |
| Bolondo 16/1-39, caryopsis 2          | 373                 | 1.9+   | 1.4     | 1.5       | ~1.4 | 0.93 |
| Bolondo 16/1-39, caryopsis 3          | 373                 | 2.1    | 1.4     | 1.3       | 1.50 | 1.08 |
| Bolondo 16/1-39, caryopsis 4          | 373                 | 1.9+   | 1.4     | n.a.      | ~1.4 | n.a. |
| Bolondo 16/1-39, caryopsis 5          | 373                 | 2.3    | 1.4     | 1.2       | 1.64 | 1.17 |
| Bolondo 16/1-39, caryopsis 6          | 373                 | 2.0    | 1.4     | 1.2       | 1.42 | 1.19 |
| Bolondo 16/1-39, caryopsis 7          | 373                 | 1.8+   | 1.3     | 1.2       | ~1.4 | 1.08 |
| Bolondo 16/1-39, caryopsis 8          | 373                 | 2.0+   | 1.3     | 1.3       | ~1.6 | 1.01 |
| Bolondo 16/1-39, caryopsis 9          | 373                 | 1.8    | 1.2     | 1.2       | 1.53 | 1.00 |
| Bolondo 16/1-39, caryopsis 10         | 373                 | 2.0    | 1.1     | 1.1       | 1.87 | 1.00 |
| Bolondo 16/1-39, caryopsis 11         | 373                 | 1.9+   | 1.2+    | 1.0+      | ~1.6 | ~1.2 |
| Mbandaka 11/1-42, caryopsis 1 (dated) | 5                   | 1.8+   | 1.6     | 1.6       | ~1.2 | 1.00 |
| Mbandaka 11/1-42, caryopsis 2 (dated) | 5                   | 2.3    | 1.2     | 1.2       | 1.92 | 1.00 |
| Mbandaka 11/1-42, caryopsis 3         | 5                   | 1.9+   | 1.5     | 1.5       | ~1.3 | 1.00 |
| lyonda 15/1/6-64 (dated)              | 100                 | 1.3+   | 1.0     | 0.9       | ~1.3 | 1.10 |
| lyonda 12/1/1-27, caryopsis 1 (dated) | 34                  | 1.2+   | 0.8     | 0.7       | ~1.5 | 1.14 |
| lyonda 12/1/1-27, caryopsis 2         | 34                  | 1.1+   | 0.8     | 0.8       |      | 1.00 |
| lyonda 12/1/1-25 (dated)              | 33                  | 1.1+   | 1.0     | 0.9       | ~1.1 | 1.10 |
| lyonda 15/1/6-73, caryopsis 1         | 105                 | 1.6+   | 1.2     | 1.2       |      | 1.00 |
| lyonda 15/1/6-73, caryopsis 2         | 105                 | 1.9+   | 1.2     | 1.2       |      | 1.00 |
| lyonda 15/1/6-73, caryopsis 3         | 105                 | 1.6+   | 1.1     | 1.0       |      | 1.10 |
| lyonda 15/1/6-73, caryopsis 4         | 105                 | 1.4+   | 1.0     | 0.6+      |      |      |
| lyonda 15/1/6-73, caryopsis 5         | 105                 | 1.4+   | 1.1     | 1.0       |      | 1.10 |
| lyonda 15/1/6-73, caryopsis 6         | 105                 | 1.3+   | 1.1     | 1.1       |      | 1.00 |
| lyonda 15/1/6-73, caryopsis 7         | 105                 | 1.3+   | 1.4     | 1.5       |      | 0.90 |
| lyonda 15/1/6-73, caryopsis 8         | 105                 | 1.4+   | 1.4     | 1.3       |      | 1.10 |
| lyonda 15/1/6-73, caryopsis 9         | 105                 | 1.5+   | 1.3     | 1.2       |      | 1.10 |
| lyonda 15/1/6-73, caryopsis 10        | 105                 | 1.1+   | 1.2     | 1.2       |      | 1.00 |
| lyonda 15/1/6-73, caryopsis 11        | 105                 | 1.5+   | 1.0     | 1.0       |      | 1.00 |
| lyonda 15/1/6-73, caryopsis 12        | 105                 | 1.8+   | 1.4     | 1.4       |      | 1.00 |
| lyonda 15/1/7-18, caryopsis 1         | 113                 | 1.9    | 1.1     | 1.2       | 1.70 | 0.90 |
| lyonda 15/1/7-18, caryopsis 2         | 113                 | 1.8    | 1.3     | 1.3       | 1.40 | 1.00 |
| lyonda 15/1/7-18, caryopsis 3         | 113                 | 1.3+   | 1.0     | 1.0       |      | 1.00 |
| lyonda 15/1/6-33, caryopsis 1         | 92                  | 1.6+   | 1.4     | 1.4       |      | 1.00 |
| lyonda 15/1/6-33, caryopsis 2         | 92                  | 2.0+   | 1.6     | 1.4       |      | 1.10 |
|                                       |                     |        |         |           |      |      |

+ = Measurements give minimum values; basis of caryopsis missing, or caryopsis damaged. Minimum values not considered in calculation of mean values and L:B. In Bolondo 16/1-39 there are more inflated or damaged caryopses which could not be measured.

Katharina Neumann\*, Barbara Eichhorn†, Hans-Peter Wotzka: Iron Age plant subsistence in the Inner Congo Basin (DR Congo). Vegetation History and Archaeobotany

\*Goethe University Frankfurt, Germany, Email: k.neumann@em.uni-frankfurt.de

**ESM 2 Table 3**, Metrical data of caryopses of modern *Pennisetum* (*Cenchrus*) and *Sorghum* species (mm)

| Species                                                   | Specimen ID | L       | B       | T       | L:B       | B:T       |
|-----------------------------------------------------------|-------------|---------|---------|---------|-----------|-----------|
| <b><i>Pennisetum glaucum</i></b><br><b>Frankfurt 3455</b> | Pg 3455-1   | 3.5     | 2.3     | 2.4     | 1.5       | 0.96      |
|                                                           | Pg3455-2    | 3.5     | 2.4     | 2.3     | 1.46      | 1.04      |
|                                                           | Pg 3455-3   | 3.1     | 2.1     | 2.2     | 1.48      | 0.95      |
|                                                           | Pg 3455-4   | 3.1     | 1.8     | 1.7     | 1.72      | 1.06      |
|                                                           | Pg 3455-5   | 2.7     | 1.5     | 1.7     | 1.8       | 0.88      |
|                                                           | Pg 3455-6   | 3.7     | 2       | 1.6     | 1.85      | 1.25      |
|                                                           | Pg 3455-7   | 3.1     | 1.9     | 1.7     | 1.63      | 1.12      |
|                                                           | Pg 3455-8   | 2.6     | 2.5     | 2.5     | 1.04      | 1         |
|                                                           | Pg 3455-9   | 1.8     | 2       | 1.8     | 0.9       | 1.11      |
|                                                           | Pg 3455-10  | 1.8     | 2.2     | 2.4     | 0.82      | 0.92      |
|                                                           | mean        | 2.89    | 2.07    | 2.03    | 1.42      | 1.03      |
|                                                           | range       | 1.8–3.7 | 1.5–2.4 | 1.6–2.5 | 0.82–1.85 | 0.88–1.25 |
| <b><i>Pennisetum glaucum</i></b><br><b>Frankfurt 3665</b> | Pg 3665-1   | 1.8     | 1.4     | 1.3     | 1.29      | 1.08      |
|                                                           | Pg 3665-2   | 1.8     | 1.4     | 1.3     | 1.29      | 1.08      |
|                                                           | Pg 3665-3   | 1.7     | 1.3     | 1.1     | 1.36      | 1.18      |
|                                                           | Pg 3665-4   | 1.9     | 1.4     | 1.4     | 1.36      | 1         |
|                                                           | Pg 3665-5   | 1.8     | 1.4     | 1.3     | 1.29      | 1.08      |
|                                                           | Pg 3665-6   | 1.8     | 1.5     | 1.5     | 1.2       | 1         |
|                                                           | Pg 3665-7   | 1.8     | 1.5     | 1.5     | 1.2       | 1         |
|                                                           | mean        | 1.8     | 1.41    | 1.34    | 1.28      | 1.06      |
|                                                           | range       | 1.7–1.9 | 1.3–1.5 | 1.1–1.5 | 1.2–1.36  | 1.08–1.18 |
| <b><i>Pennisetum glaucum</i></b><br><b>Frankfurt 666</b>  | Pg 666-1    | 3.4     | 2.1     | 2.1     | 1.62      | 1         |
|                                                           | Pg 666-2    | 3       | 1.6     | 1.5     | 1.88      | 1.07      |
|                                                           | Pg 666-3    | 3.7     | 2       | 2.1     | 1.85      | 0.95      |
|                                                           | Pg 666-4    | 3.8     | 1.8     | 1.8     | 2.11      | 1         |
|                                                           | Pg 666-5    | 4       | 2.1     | 2.1     | 1.9       | 1.2       |
|                                                           | Pg 666-6    | 3.2     | 1.8     | 1.5     | 1.78      | 1.2       |
|                                                           | Pg 666-7    | 3.7     | 2       | 1.9     | 3.5       | 1.05      |
|                                                           | Pg 666-8    | 4       | 1.7     | 1.6     | 2.35      | 1.06      |
|                                                           | Pg 666-9    | 4       | 1.7     | 1.9     | 2.35      | 0.9       |
|                                                           | mean        | 3.64    | 1.87    | 1.83    | 2.15      | 1.05      |
|                                                           | range       | 3–4     | 1.7–2.1 | 1.5–2.1 | 1.62–2.35 | 0.9–1.2   |
| <b><i>Pennisetum glaucum</i></b><br><b>Frankfurt 275</b>  | Pg 275-1    | 3.9     | 3.1     | 3.1     | 1.26      | 1         |
|                                                           | Pg 275-2    | 4.2     | 2.6     | 2.5     | 1.62      | 1.04      |
|                                                           | Pg 275-3    | 4.1     | 3       | 2.6     | 1.37      | 1.15      |
|                                                           | Pg 275-4    | 4.7     | 3       | 2.7     | 1.57      | 1.11      |
|                                                           | Pg 275-5    | 3.5     | 2.8     | 3.4     | 1.25      | 0.82      |
|                                                           | Pg 275-6    | 3.8     | 2.9     | 2.7     | 1.31      | 1.07      |
|                                                           | Pg 275-7    | 3.4     | 2.3     | 2.3     | 1.48      | 1         |
|                                                           | Pg 275-8    | 2.6     | 2       | 2       | 1.3       | 1         |
|                                                           | Pg 275-9    | 4.7     | 2       | 2       | 2.35      | 1         |
|                                                           | Pg 275-10   | 2.2     | 2       | 2.2     | 1.1       | 0.91      |
|                                                           | mean        | 3.71    | 2.57    | 2.55    | 1.46      | 1.01      |
|                                                           | range       | 2.2–4.7 | 2–3.1   | 2–3.4   | 1.1–2.35  | 0.82–1.15 |

| Species                                                                                 | Specimen ID                                                                             | L          | B         | T         | L:B       | B:T       |
|-----------------------------------------------------------------------------------------|-----------------------------------------------------------------------------------------|------------|-----------|-----------|-----------|-----------|
| <b><i>Pennisetum purpureum</i></b><br>Kew 8769                                          | Pp Kew 87694-1                                                                          | 2.07       | 0.93      | 0.64      | 2.23      | 1.45      |
|                                                                                         | Pp Kew 87694-2                                                                          | 1.82       | 0.82      | 0.56      | 2.22      | 1.46      |
|                                                                                         | Pp Kew 87694-3                                                                          | 1.59       | 0.76      | 0.59      | 2.09      | 1.52      |
|                                                                                         | Pp Kew 87694-4                                                                          | 1.55       | 0.76      | 0.42      | 2.04      | 1.81      |
|                                                                                         | Pp Kew 87694-5                                                                          | 1.55       | 0.83      | 0.55      | 1.87      | 1.51      |
|                                                                                         | Pp B&T world seeds                                                                      | 1.61       | 0.65      | 0.38      | 2.47      | 1.71      |
|                                                                                         | mean                                                                                    | 1.7        | 0.79      | 0.52      | 2.15      | 1.58      |
|                                                                                         | range                                                                                   | 1.55–2.01  | 0.65–0.93 | 0.38–0.64 | 1.87–2.47 | 1.45–1.81 |
| <b><i>Sorghum bicolor</i></b><br><b>ssp. <i>verticilliflorum</i>*</b><br>Frankfurt 1642 | Sbv 1642-1                                                                              | 4.2        | 3.3       | 1.8       | 1.27      | 1.83      |
|                                                                                         | Sbv 1642-2                                                                              | 3.9        | 2.8       | 1.9       | 1.39      | 1.47      |
|                                                                                         | Sbv 1642-3                                                                              | 3.4        | 2.5       | 1.7       | 1.36      | 1.47      |
|                                                                                         | Sbv 1642-4                                                                              | 3.3        | 2.7       | 1.5       | 1.22      | 1.8       |
|                                                                                         | Sbv 1642-5                                                                              | 3.6        | 2.7       | 1.9       | 1.33      | 1.42      |
|                                                                                         | Sbv 1642-6                                                                              | 3.6        | 2.4       | 1.5       | 1.5       | 1.6       |
|                                                                                         | Sbv 1642-7                                                                              | 3.6        | 2.9       | 1.8       | 1.24      | 1.61      |
|                                                                                         | Sbv 1642-8                                                                              | 3.8        | 2.9       | 1.9       | 1.31      | 1.53      |
|                                                                                         | Sbv 1642-9                                                                              | 3.7        | 2.6       | 1.9       | 1.42      | 1.37      |
|                                                                                         | Sbv 1642-10                                                                             | 3.5        | 2.7       | 2         | 1.3       | 1.35      |
|                                                                                         | mean                                                                                    | 3.66       | 2.75      | 1.79      | 1.33      | 1.55      |
|                                                                                         | range                                                                                   | 3.3–4.2    | 2.4–3.3   | 1.5–2     | 1.22–1.42 | 1.35–1.83 |
|                                                                                         | <b><i>Sorghum bicolor</i></b><br><b>ssp. <i>verticilliflorum</i>*</b><br>Frankfurt 1645 | Sbv 1645-1 | 3.4       | 2.8       | 2         | 1.21      |
| Sbv 1645-2                                                                              |                                                                                         | 3.5        | 2.9       | 2.1       | 1.21      | 1.38      |
| Sbv 1645-3                                                                              |                                                                                         | 3.5        | 2.7       | 2         | 1.3       | 1.35      |
| Sbv 1645-4                                                                              |                                                                                         | 3.9        | 2.2       | 1.6       | 1.77      | 1.38      |
| Sbv 1645-5                                                                              |                                                                                         | 3.8        | 2.7       | 2.1       | 1.41      | 1.29      |
| Sbv 1645-6                                                                              |                                                                                         | 3.4        | 2.8       | 2         | 1.21      | 1.4       |
| Sbv 1645-7                                                                              |                                                                                         | 3.5        | 2.1       | 1.6       | 1.67      | 1.31      |
| Sbv 1645-8                                                                              |                                                                                         | 3.4        | 2.8       | 2         | 1.21      | 1.4       |
| Sbv 1645-9                                                                              |                                                                                         | 3.7        | 2.6       | 2         | 1.42      | 1.3       |
| Sbv 1645-10                                                                             |                                                                                         | 3.7        | 2.3       | 1.5       | 1.61      | 1.53      |
| mean                                                                                    |                                                                                         | 3.58       | 2.59      | 1.89      | 1.4       | 1.37      |
| range                                                                                   |                                                                                         | 3.4–3.9    | 2.1–2.9   | 1.5–2.1   | 1.21–1.77 | 1.29–1.53 |
| <b><i>Sorghum bicolor</i></b><br><b>ssp. <i>verticilliflorum</i>*</b><br>Frankfurt 2318 |                                                                                         | Sbv 2318-1 | 3.6       | 2.4       | 1.6       | 1.5       |
|                                                                                         | Sbv 2318-2                                                                              | 3.2        | 2.3       | 1.6       | 1.39      | 1.44      |
|                                                                                         | Sbv 2318-3                                                                              | 2.9        | 2.1       | 1.4       | 1.38      | 1.5       |
|                                                                                         | Sbv 2318-4                                                                              | 3.1        | 2.1       | 1.3       | 1.49      | 1.62      |
|                                                                                         | Sbv 2318-5                                                                              | 3.6        | 2.7       | 1.8       | 1.33      | 1.5       |
|                                                                                         | Sbv 2318-6                                                                              | 3.4        | 2.5       | 1.6       | 1.36      | 1.56      |
|                                                                                         | Sbv 2318-7                                                                              | 2.9        | 2.1       | 1.4       | 1.38      | 1.5       |
|                                                                                         | Sbv 2318-8                                                                              | 2.9        | 2.1       | 1.3       | 1.38      | 1.62      |
|                                                                                         | Sbv 2318-9                                                                              | 3.1        | 2.3       | 1.3       | 1.35      | 1.77      |
|                                                                                         | Sbv 2318-10                                                                             | 3.3        | 2.4       | 1.7       | 1.38      | 1.41      |
|                                                                                         | mean                                                                                    | 3.2        | 2.4       | 1.5       | 1.39      | 1.54      |
|                                                                                         | range                                                                                   | 2.9–3.6    | 2.1–2.5   | 1.3–1.7   | 1.33–1.49 | 1.41–1.77 |
|                                                                                         | <b><i>Sorghum bicolor</i></b><br><b>ssp. <i>verticilliflorum</i>*</b><br>Frankfurt 1106 | Sbv 1106-1 | 4.4       | 2.5       | 1.5       | 1.76      |
| Sbv 1106-2                                                                              |                                                                                         | 4.3        | 2.4       | 1.5       | 1.79      | 1.6       |
| Sbv 1106-3                                                                              |                                                                                         | 4.4        | 2.5       | 1.6       | 1.76      | 1.56      |
| Sbv 1106-4                                                                              |                                                                                         | 3.8        | 2.1       | 1.1       | 1.81      | 1.9       |
| Sbv 1106-5                                                                              |                                                                                         | 4.3        | 2.2       | 1.3       | 1.95      | 1.69      |
| Sbv 1106-6                                                                              |                                                                                         | 3.8        | 2.3       | 1.4       | 1.65      | 1.64      |
| mean                                                                                    |                                                                                         | 4.17       | 2.33      | 1.4       | 1.79      | 1.67      |
| range                                                                                   |                                                                                         | 3.8–4.4    | 2.1–2.5   | 1.1–1.6   | 1.65–1.95 | 1.56–1.9  |

| Species<br>Collection number                                                                                                                                                        | Specimen ID | L       | B       | T       | L:B       | B:T       |
|-------------------------------------------------------------------------------------------------------------------------------------------------------------------------------------|-------------|---------|---------|---------|-----------|-----------|
| <i>Sorghum bicolor</i><br><i>ssp. verticilliflorum*</i><br>Frankfurt 1370                                                                                                           | Sbv 1370-1  | 2.1     | 1.5     | 0.9     | 1.4       | 1.67      |
|                                                                                                                                                                                     |             |         |         |         |           |           |
|                                                                                                                                                                                     |             |         |         |         |           |           |
|                                                                                                                                                                                     |             |         |         |         |           |           |
| <i>Sorghum bicolor</i><br><i>ssp. bicolor</i><br>(race bicolor)<br>Frankfurt 1641                                                                                                   | Sbbb 1641-1 | 4.4     | 3.6     | 2.2     | 1.22      | 1.64      |
|                                                                                                                                                                                     | Sbbb 1641-2 | 4.7     | 4       | 2.2     | 1.18      | 1.8       |
|                                                                                                                                                                                     | Sbbb 1641-3 | 4.4     | 3.2     | 2       | 1.38      | 1.6       |
|                                                                                                                                                                                     | Sbbb 1641-4 | 3.9     | 3       | 2       | 1.3       | 1.5       |
|                                                                                                                                                                                     | Sbbb 1641-5 | 3.9     | 3       | 2       | 1.3       | 1.5       |
|                                                                                                                                                                                     | mean        | 4.26    | 3.36    | 2.08    | 1.28      | 1.61      |
|                                                                                                                                                                                     | range       | 3.9–4.7 | 3–4     | 2–2.2   | 1.18–1.38 | 1.5–1.8   |
|                                                                                                                                                                                     |             |         |         |         |           |           |
| <i>Sorghum bicolor</i><br>Frankfurt 3456                                                                                                                                            | Sbb 3456-1  | 5.9     | 4.7     | 2.9     | 1.25      | 1.62      |
|                                                                                                                                                                                     | Sbb 3456-2  | 5.1     | 4.3     | 2.8     | 1.19      | 1.54      |
|                                                                                                                                                                                     | Sbb 3456-3  | 4.9     | 3.6     | 2.5     | 1.36      | 1.44      |
|                                                                                                                                                                                     | Sbb 3456-4  | 5.6     | 3.6     | 2.7     | 1.56      | 1.33      |
|                                                                                                                                                                                     | Sbb 3456-5  | 4.1     | 3.7     | 2.6     | 1.11      | 1.42      |
|                                                                                                                                                                                     | Sbb 3456-6  | 6.1     | 5.3     | 3       | 1.15      | 1.77      |
|                                                                                                                                                                                     | Sbb 3456-7  | 5.3     | 4.7     | 3       | 1.13      | 1.57      |
|                                                                                                                                                                                     | Sbb 3456-8  | 5.1     | 4.8     | 3       | 1.06      | 1.6       |
|                                                                                                                                                                                     | Sbb 3456-9  | 4.9     | 3.7     | 2.8     | 1.32      | 1.32      |
|                                                                                                                                                                                     | Sbb 3456-10 | 5.3     | 5       | 3.4     | 1.06      | 1.47      |
|                                                                                                                                                                                     | Sbb 3456-11 | 5.3     | 4.4     | 3.4     | 1.2       | 1.35      |
|                                                                                                                                                                                     | Sbb 3456-12 | 5.3     | 4.2     | 3.1     | 1.26      | 1.35      |
|                                                                                                                                                                                     | Sbb 3456-13 | 4.4     | 4       | 2.3     | 1.1       | 1.74      |
|                                                                                                                                                                                     | Sbb 3456-14 | 4       | 3.3     | 2.3     | 1.21      | 1.43      |
|                                                                                                                                                                                     | Sbb 3456-15 | 4.6     | 4.5     | 2.7     | 1.02      | 1.67      |
|                                                                                                                                                                                     | mean        | 5.06    | 4.25    | 2.83    | 1.2       | 1.51      |
|                                                                                                                                                                                     | range       | 4–6.1   | 3.3–5.3 | 2.3–3.4 | 1.02–1.56 | 1.33–1.77 |
|                                                                                                                                                                                     |             |         |         |         |           |           |
| <i>Sorghum bicolor</i><br>Frankfurt 1366                                                                                                                                            | Sbb 1366-1  | 5.8     | 4.5     | 3.4     | 1.29      | 1.32      |
|                                                                                                                                                                                     | Sbb 1366-2  | 5.9     | 4.3     | 3.7     | 1.37      | 1.3       |
|                                                                                                                                                                                     | Sbb 1366-3  | 5       | 4.4     | 3.2     | 1.14      | 1.38      |
|                                                                                                                                                                                     | Sbb 1366-4  | 5.1     | 4.3     | 4.3     | 1.19      | 1         |
|                                                                                                                                                                                     | Sbb 1366-5  | 4.3     | 4.4     | 3.7     | 0.98      | 1.19      |
|                                                                                                                                                                                     | Sbb 1366-6  | 5       | 5.2     | 3.6     | 0.96      | 1.44      |
|                                                                                                                                                                                     | Sbb 1366-7  | 5       | 5.2     | 4.1     | 0.96      | 1.27      |
|                                                                                                                                                                                     | Sbb 1366-8  | 5       | 5.3     | 3.8     | 0.94      | 1.4       |
|                                                                                                                                                                                     | Sbb 1366-9  | 4.9     | 4.9     | 3.9     | 1         | 1.26      |
|                                                                                                                                                                                     | Sbb 1366-10 | 4.1     | 4.2     | 3.2     | 0.98      | 1.31      |
|                                                                                                                                                                                     | mean        | 5.01    | 5.67    | 3.69    | 1.08      | 1.29      |
|                                                                                                                                                                                     | range       | 4.1–5.9 | 4.2–5.3 | 3.2–4.3 | 0.94–1.37 | 1–1.44    |
|                                                                                                                                                                                     |             |         |         |         |           |           |
| *Nomenclature after Wiersema and Dahlberg (2007),<br>The nomenclature of <i>Sorghum bicolor</i> (L.) Moench (Gramineae).<br>Taxon 56, 941–946. Synonym: <i>Sorghum arundinaceum</i> |             |         |         |         |           |           |

ESM 2 Table 4, Complete results of studied phytolith samples

| Soil Sample ID | Phytolith extraction serial number | Musa phytoliths present | Site     | Context        | Archaeological Phase                                                                                  | <sup>14</sup> C Date associated | Radiocarbon Lab. Number |
|----------------|------------------------------------|-------------------------|----------|----------------|-------------------------------------------------------------------------------------------------------|---------------------------------|-------------------------|
| 356            | 794                                | Yes                     | Iyonda   | IYO 15/68-1    | Under modern sweet banana, surface                                                                    |                                 |                         |
| 358            | 795                                | Yes                     | Iyonda   | IYO 15/69-1    | Under modern plantain, surface                                                                        |                                 |                         |
| 360            | 796                                | Yes                     | Iyonda   | IYO 15/70-1    | Under modern banana (sweet or plantain), surface                                                      |                                 |                         |
| 296            | 790                                | Yes                     | Iyonda   | IYO 15/19-43   | Botendo                                                                                               | 120 ± 30 BP                     | Poz-79290               |
| 30             | 720                                | Yes                     | Mbandaka | MBA 11/1-46    | From colluvium containing Nkile, Bondongo, and Bokele ceramics ( <sup>14</sup> C date matches Nkile)  | 290 ± 30 BP                     | Poz-79306               |
| 364            | 805                                | Yes                     | Bolondo  | BLD 16/1-35    | Bolondo                                                                                               |                                 |                         |
| 386            | 797                                | Yes                     | Bolondo  | BLD 16/5-49    | Bolondo                                                                                               |                                 |                         |
| 370            | 806                                | Yes                     | Bolondo  | BLD 16/1-38    | Bolondo                                                                                               | 420 ± 30 BP                     | Beta-469857             |
| 372            | 864                                | Yes                     | Bolondo  | BLD 16/1-39    | Bolondo                                                                                               | 480 ± 30 BP                     | Beta-469858             |
| 374            | 842                                | Yes                     | Bolondo  | BLD 16/1-40    | Bolondo                                                                                               |                                 |                         |
| 376            | 807                                | Yes                     | Bolondo  | BLD 16/1-41    | Bolondo                                                                                               |                                 |                         |
| 397            | 799                                | Yes                     | Bolondo  | BLD 16/5-57    | Bolondo                                                                                               |                                 |                         |
| 413            | 803                                | Yes                     | Bolondo  | BLD 16/5-72    | Wema/Bolondo                                                                                          | 410 ± 30 BP                     | Beta-447441             |
| 417            | 804                                | Yes                     | Bolondo  | BLD 16/5-76    | Wema                                                                                                  | 520 ± 30 BP                     | Beta-447442             |
| 39             | 781                                | No                      | Iyonda   | IYO 12/1-23    | No archaeological finds                                                                               |                                 |                         |
| 504            | 916                                | No                      | Iyonda   | IYO 16/11      | Colluvium (no archaeological finds)                                                                   |                                 |                         |
| 62             | 773                                | No                      | Iyonda   | IYO 15/1/2-4   | Mixed (modern + ancient)                                                                              |                                 |                         |
| 382            | 863                                | No                      | Bolondo  | BLD 16/5-46    | Ilemba-Bokonda                                                                                        |                                 |                         |
| 68             | 774                                | No                      | Iyonda   | IYO 15/1/3-7   | Botendo                                                                                               | 40 ± 30 BP<br>115 ± 30 BP       | Poz-75080<br>Poz-74880  |
| 393            | 798                                | No                      | Bolondo  | BLD 16/5-53    | Bokone                                                                                                |                                 |                         |
| 362            | 869                                | No                      | Bolondo  | BLD 16/1-34    | Bolondo                                                                                               |                                 |                         |
| 366            | 841                                | No                      | Bolondo  | BLD 16/1-36    | Bolondo                                                                                               |                                 |                         |
| 368            | 870                                | No                      | Bolondo  | BLD 16/1-37    | Bolondo                                                                                               |                                 |                         |
| 405            | 801                                | No                      | Bolondo  | BLD 16/5-65    | [Bolondo] No archaeological finds                                                                     |                                 |                         |
| 409            | 802                                | No                      | Bolondo  | BLD 16/5-69    | [Bolondo] No archaeological finds                                                                     |                                 |                         |
| 401            | 800                                | No                      | Bolondo  | BLD 16/5-61    | Bolondo                                                                                               | 334 ± 30 BP                     | Poz-98058               |
| 326            | 792                                | No                      | Iyonda   | IYO 15/63/3-32 | Nkile                                                                                                 | 490 ± 30 BP                     | Poz-79295               |
| 328            | 793                                | No                      | Iyonda   | IYO 15/63/3-64 | Nkile                                                                                                 | 495 ± 30 BP                     | Poz-79296               |
| 350            | 910                                | No                      | Iyonda   | IYO 15/64/2-7  | Bondongo/Nkile                                                                                        | 500 ± 30 BP<br>535 ± 30 BP      | Poz-79300<br>Poz-79299  |
| 333            | 909                                | No                      | Iyonda   | IYO 15/63/4-47 | Bondongo/Nkile                                                                                        | 545 ± 30 BP                     | Poz-79297               |
| 26             | 765                                | No                      | Mbandaka | MBA 11/1/2-15  | Bondongo/Nkile                                                                                        | 630 ± 30 BP<br>660 ± 30 BP      | Poz-72478<br>Poz-72477  |
| 29             | 767                                | No                      | Mbandaka | MBA 11/1/2-41  | Bondongo/Nkile                                                                                        | 630 ± 30 BP<br>660 ± 30 BP      | Poz-72478<br>Poz-72477  |
| 479            | 843                                | No                      | Iyonda   | IYO 16/3       | Colluvium (Bondongo to modern finds)                                                                  |                                 |                         |
| 489            | 915                                | No                      | Iyonda   | IYO 16/6       | Colluvium (Bondongo to modern finds)                                                                  |                                 |                         |
| 27             | 766                                | No                      | Mbandaka | MBA 11/1-24    | From colluvium containing Nkile, Bondongo, and Bokele ceramics                                        |                                 |                         |
| 24             | 717                                | No                      | Mbandaka | MBA 11/1-10    | From colluvium containing Nkile, Bondongo, and Bokele ceramics ( <sup>14</sup> C date matches Bokele) | 1660 ± 35 BP                    | Poz-48986               |



ESM 2 Table 4, Complete results of studied phytolith samples

| Soil Sample ID | Phytolith extraction serial number | Musa phytoliths present | Site     | Context                                                | Archaeological Phase                                      | <sup>14</sup> C Date associated                                              | Radiocarbon Lab. Number                                       |
|----------------|------------------------------------|-------------------------|----------|--------------------------------------------------------|-----------------------------------------------------------|------------------------------------------------------------------------------|---------------------------------------------------------------|
| 25             | 718                                | No                      | Mbandaka | MBA 11/1/1-14                                          | Bokele                                                    | 1745 ± 35 BP<br>1785 ± 30 BP<br>1810 ± 30 BP<br>1835 ± 35 BP<br>2160 ± 30 BP | Poz-48993<br>Poz-48989<br>Poz-48991<br>Poz-48995<br>Poz-48988 |
| 28             | 719                                | No                      | Mbandaka | MBA 11/1/1-36                                          | Bokele                                                    | 1745 ± 35 BP<br>1785 ± 30 BP<br>1810 ± 30 BP<br>1835 ± 35 BP<br>2160 ± 30 BP | Poz-48993<br>Poz-48989<br>Poz-48991<br>Poz-48995<br>Poz-48988 |
| 59             | 768                                | No                      | lyonda   | IYO 15/1/1-3                                           | Bokuma                                                    |                                                                              |                                                               |
| 448            | 911                                | No                      | lyonda   | IYO 16/1/6-63                                          | Bokuma                                                    |                                                                              |                                                               |
| 451            | 912                                | No                      | lyonda   | IYO 16/1/6-82                                          | Bokuma                                                    |                                                                              |                                                               |
| 459            | 913                                | No                      | lyonda   | IYO 16/1/6-186                                         | Bokuma                                                    |                                                                              |                                                               |
| 465            | 914                                | No                      | lyonda   | IYO 16/1/6-218                                         | Bokuma                                                    |                                                                              |                                                               |
| 290            | 789                                | No                      | lyonda   | IYO 15/19/4-31                                         | Bokuma                                                    |                                                                              |                                                               |
| 141            | 785                                | No                      | lyonda   | IYO 15/1/13-6, sediment fill, vessel centre            | Bokuma                                                    |                                                                              |                                                               |
| 141            | 786                                | No                      | lyonda   | IYO 15/1/13-6, sediment fill, near vessel margin       | Bokuma                                                    |                                                                              |                                                               |
| 141            | 787                                | No                      | lyonda   | IYO 15/1/13-6, sediment from sherd, upper vessel part  | Bokuma                                                    | 1395 ± 30 BP<br>1475 ± 30 BP                                                 | Poz-74894<br>Poz-74893                                        |
| 141            | 788                                | No                      | lyonda   | IYO 15/1/13-6, sediment from sherd, middle vessel part | Bokuma                                                    |                                                                              |                                                               |
| 308            | 791                                | No                      | lyonda   | IYO 15/42/4-24                                         | Bokuma (despite incongruously early <sup>14</sup> C date) | 2165 ± 30 BP                                                                 | Poz-79291                                                     |
| 77             | 769                                | No                      | lyonda   | IYO 15/1/4-19 (stratigraphically reassigned to Pit 6)  | Mixed (Bokuma + Imbonga)                                  |                                                                              |                                                               |
| 83             | 775                                | No                      | lyonda   | IYO 15/1/6-5                                           | Mixed (Imbonga + Bokuma)                                  |                                                                              |                                                               |
| 38             | 782                                | No                      | lyonda   | IYO 12/1-20                                            | Mixed (Imbonga + Bokuma)                                  |                                                                              |                                                               |
| 109            | 783                                | No                      | lyonda   | IYO 15/1/6-68, Vessel b, sediment upper rim            | Imbonga?                                                  |                                                                              |                                                               |
| 109            | 784                                | No                      | lyonda   | IYO 15/1/6-68, Vessel b, sediment from sherd           | Imbonga?                                                  |                                                                              |                                                               |
| 483            | 844                                | No                      | lyonda   | IYO 16/4                                               | Colluvium (Imbonga to modern finds)                       |                                                                              |                                                               |
| 42             | 723                                | No                      | lyonda   | IYO 12/1/1-35                                          | Imbonga                                                   |                                                                              |                                                               |
| 43             | 724                                | No                      | lyonda   | IYO 12/1/1-36                                          | Imbonga                                                   |                                                                              |                                                               |
| 101            | 770                                | No                      | lyonda   | IYO 15/1/6-65                                          | Mixed (Imbonga + Bokuma)                                  |                                                                              |                                                               |
| 40             | 721                                | No                      | lyonda   | IYO 12/1/1-25                                          | Imbonga                                                   | 2040 ± 60 BP<br>2100 ± 30 BP                                                 | Poz-74815<br>Poz-79307                                        |
| 142            | 779                                | No                      | lyonda   | IYO 15/1/14-3                                          | Imbonga                                                   | 2080 ± 30 BP<br>2100 ± 30 BP                                                 | Poz-74895<br>Poz-74896                                        |

**ESM 2 Table 4**, Complete results of studied phytolith samples

| Soil Sample ID | Phytolith extraction serial number | Musa phytoliths present | Site   | Context                                   | Archaeological Phase | <sup>14</sup> C Date associated                                                              | Radiocarbon Lab. Number                                                        |
|----------------|------------------------------------|-------------------------|--------|-------------------------------------------|----------------------|----------------------------------------------------------------------------------------------|--------------------------------------------------------------------------------|
| 128            | 778                                | No                      | lyonda | IYO 15/1/9-23                             | Imbonga              | 2120 ± 30 BP<br>2140 ± 30 BP                                                                 | Poz-74890<br>Poz-74889                                                         |
| 123            | 771                                | No                      | lyonda | IYO 15/1/8-26                             | Imbonga              | 2170 ± 30 BP<br>2230 ± 30 BP                                                                 | Poz-74888<br>Poz-74887                                                         |
| 41             | 722                                | No                      | lyonda | IYO 12/1/1-27                             | Imbonga              | 2180 ± 50 BP                                                                                 | Poz-74816                                                                      |
| 111            | 776                                | No                      | lyonda | IYO 15/1/7-16                             | Imbonga              | 2195 ± 30 BP<br>2290 ± 30 BP                                                                 | Poz-74886<br>Poz-74885                                                         |
| 117            | 777                                | No                      | lyonda | IYO 15/1/7-27                             | Imbonga              | 2195 ± 30 BP<br>2290 ± 30 BP                                                                 | Poz-74886<br>Poz-74885                                                         |
| 524            | 862                                | No                      | lyonda | IYO 15/1/7-41,<br>sediment fill in vessel | Imbonga              | 2195 ± 30 BP<br>2290 ± 30 BP                                                                 | Poz-74886<br>Poz-74885                                                         |
| 240            | 772                                | No                      | lyonda | IYO 15/2/4-278                            | Imbonga              | 2040 ± 30 BP<br>2110 ± 30 BP<br>2180 ± 30 BP<br>2185 ± 30 BP<br>2200 ± 30 BP<br>2210 ± 30 BP | Beta-441457<br>Beta-441458<br>Poz-74918<br>Poz-74919<br>Poz-74899<br>Poz-74979 |
| 147            | 780                                | No                      | lyonda | IYO 15/1/15-10                            | Imbonga              | 2220 ± 30 BP<br>2235 ± 30 BP                                                                 | Poz-74897<br>Poz-74898                                                         |
