# Supplementary material for: Iron Age plant subsistence in the Inner Congo Basin (DR Congo)
Source: Springer Nature journal article supplement (doi:10.1007/s00334-021-00865-8), 2022-01-31

**ESM 3** Map of West and Central Africa showing regions and sites outside the Inner Congo Basin discussed in the text. Presumptive initial Pearl millet domestication area after Burgarella et al. (2018:1378, fig. 1); NE Burkina Faso Iron Age sites after Kahlheber (2004: 28, fig. 2); Nok Culture sites after Franke et al. (2020:132, fig. 1); West Coastal Bantu Homeland after Bostoen and Koni Muluwa (2017: 238, fig. 1). Green shading indicates the extent of tropical forests for the year 2001, extracted from MODIS. For more details see caption for Fig. 1 in the main text.

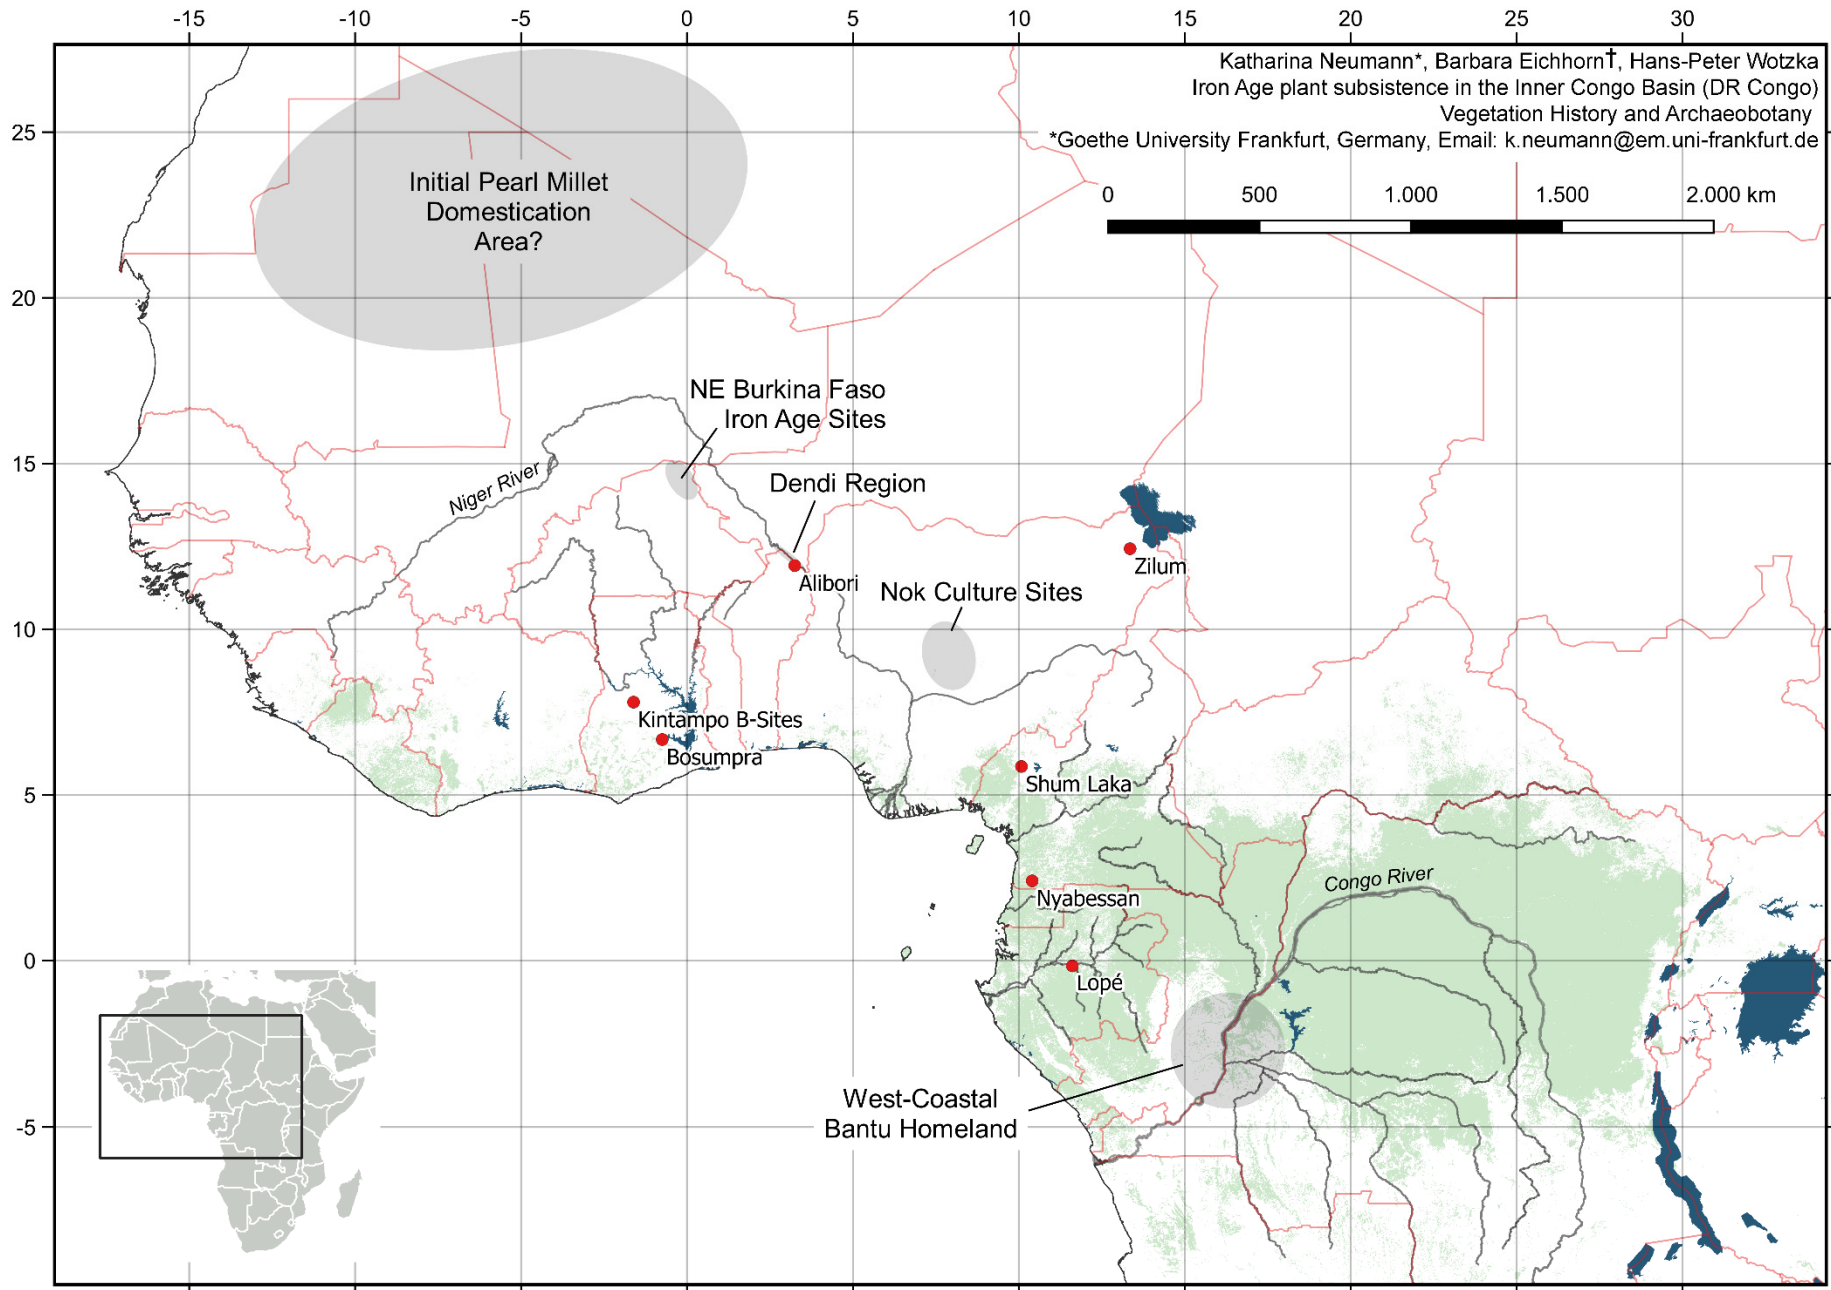

Supplement: MOESM3 [file 334_2021_865_MOESM3_ESM.pdf]
