# Supplementary material for: Iron Age plant subsistence in the Inner Congo Basin (DR Congo)
Source: Springer Nature journal article supplement (doi:10.1007/s00334-021-00865-8), 2022-01-31
Supplement: MOESM4 [file 334_2021_865_MOESM4_ESM.pdf]

**Katharina Neumann\*, Barbara Eichhorn†, Hans-Peter Wotzka**  
**Iron Age plant subsistence in the Inner Congo Basin (DR Congo)**  
**Vegetation History and Archaeobotany**

\* Goethe University Frankfurt, Germany  
Email: k.neumann@em.uni-frankfurt.de

#### **Online Resource 4**

##### **Differential diagnosis of archaeological pearl millet finds with modern related Poaceae**

We compared shape and size of the archaeobotanical finds with available information on seven related *Cenchrus* species and hybrids, and sugarcane (*Saccharum officinarum*) which is currently cultivated in the ICB. In contrast to the characteristic club-shape of pearl millet, all other species have caryopses with either elliptic, lanceolate or ovate shapes.

In addition, we conducted morphometric measurements (L=Length, B=Breadth, T=Thickness, and their corresponding ratios) for 40 charred archaeobotanical caryopses (classified as domesticated *Cenchrus americanus* or cf. *C. americanus* according to their size and state of preservation) (Online Resource 3) in comparison with modern grasses. Most Poaceae species were excluded from the measurements because their caryopses are *per se* too small to match the archaeobotanical individuals, or because the general shape of their caryopses deviates distinctly from the charred caryopses. The morphometric measurements concentrated on modern domesticated pearl millet, wild and domesticated sorghum and *C. purpureus* (syn. *Pennisetum purpureum*), a wild close pearl millet relative which Kahlheber et al. (2014) did not comprehensively consider in the differential diagnosis of the pearl millet finds of Boso-Njafo (Online Resource 5). In total, 109 individual caryopses from 13 modern samples were measured in three dimensions (length, breadth, thickness, and the respective ratios; 36x *C. americanus*, 6x *C. purpureus*; 37x wild sorghum (*Sorghum bicolor* ssp. *verticilliflorum*), and 30x domesticated sorghum (*S. bicolor* ssp. *bicolor*).

In some cases, bloating or corrosion during carbonisation and/or post-deposition restricted feasible documentation to minimum values or estimates. The bases of the archaeobotanical caryopses were often missing, and the ratio L/B, often applied in the study of ancient cereal caryopses, turned out to be problematic. In contrast, the ratio B/T, reflecting whether caryopses are dorsoventrally flattened or more or less terete, turned out to be especially useful. The caryopses of the modern domesticate are highly variable in size, but in contrast to the wild progenitor and hybrids of both species, their shape is obovate (= club-shaped), and terete, i.e. almost circular in transverse section. The B/T ratio, consistently around 1, reflects the terete shape. This is the most robust criterion for

differentiating them from closely related *Cenchrus* species, sugar cane and potentially from extraordinarily small sorghum caryopses. The 40 measured archaeological pearl millet specimens also have B/T values around 1, confirming the identification.

For some species of the genus *Cenchrus* (syn. *Pennisetum*) occurring in the DR Congo, we go further into detail here (Table 1). Domesticated pearl millet does currently no longer occur near the investigated sites. However, domesticated pearl millet *C. americanus* (syn. *P. glaucum*) and the closely related perennial wild species *C. purpureus* (syn. *P. purpureum*, napier grass), which is widely distributed in the Inner Congo Basin, hybridise easily. The resulting caryopses are more similar to domesticated pearl millet caryopses in shape than to napier grass caryopses (Dowling 2011). This fact is relevant when considering the Late Iron Age archaeobotanical finds. Theoretically, once present in the area, domesticated pearl millet might have hybridised with napier grass, and therefore finds of caryopses reminiscent of pearl millet might represent naturalised hybrids. The triploid F<sub>1</sub> hybrid plants resulting from pearl millet and napier grass crossing are, however, sterile (Brunken 1977; Dowling 2011:22; Nunes et al. 2013) precluding a persistence or an uncontrolled reproduction and establishment of pearl millet x napier grass hybrids in the wild. Therefore, the persistence of hybrids would constantly require the presence of domesticated pearl millet plants in the vicinity. The strongly dorsoventrally flattened, elliptic to oblong caryopses of the wild species *C. purpureus* itself cannot be confused with domesticated pearl millet caryopses.

*C. clandestinus* (syn. *P. clandestinum*) occurs in the DR Congo but is restricted to highland sites (1950–2700 m a.s.l.). Its caryopses are within the size range of small domesticated pearl millet but are dorsoventrally flattened and lack the diagnostic club-shape of pearl millet. *C. unisetus* (syn. *P. unisetum*) displays ovate to elliptic caryopses with an acute apex that are much smaller than the caryopses from Boso-Njafo, identified as pearl millet (Kahlheber et al. 2014). The shapes of *C. macrourus* (syn. *P. macrourum*) and *C. ciliaris* (syn. *P. ciliare*) caryopses differ from pearl millet due to their truncate apexes. According to the literature survey, *P. macrourum* caryopses also differ by their dorso-ventrally compressed shape and their length/breadth ratio (Scher et al. 2015). Caryopses of *C. trachyphyllus* (syn. *P. trachyphyllum*) are 2.5 mm long and have an oblong, dorsoventrally flattened shape (Kew Science Plants of the World Online 2020b). Besides morphological differences, Kahlheber et al. (2014) excluded this species as a candidate for confusion with pearl millet as it grows in altitude ranges of 1,000–2,500 m a.s.l. (Clayton and Renvoize 1982), i.e. not in the Inner Congo Basin lowlands.

Sugar cane (*Saccharum officinarum*) is an introduced crop but is considered in our differential diagnosis because its caryopses might occur as possible intrusions and/or during recent periods, e.g. at Bolondo. According to Clayton et al. (2006 onwards) the caryopses of this species are distinctly oblong, isodiametric and 1.5 mm long. Sugar cane caryopses displayed in Cheavegatti-Gianotto et al. (2011) lack the characteristic club-shape of pearl millet.

| Species                 | <i>Cenchrus ciliaris</i><br>(syn. <i>P. ciliare</i> )                  | <i>C. clandestinus</i><br>(syn. <i>P. clandestinum</i> )                                      | <i>C. macrourus</i><br>(syn. <i>P. macrourum</i> ) | <i>C. purpureus</i><br>(syn. <i>P. purpureum</i> )                                                                                       | <i>C. americanus</i><br>x <i>C. purpureus</i> | <i>C. trachyphyllus</i><br>(syn. <i>P. trachyphyllum</i> ) | <i>C. unisetus</i><br>(syn. <i>P. unisetum</i> )   | <i>Saccharum officinarum</i>                                                |
|-------------------------|------------------------------------------------------------------------|-----------------------------------------------------------------------------------------------|----------------------------------------------------|------------------------------------------------------------------------------------------------------------------------------------------|-----------------------------------------------|------------------------------------------------------------|----------------------------------------------------|-----------------------------------------------------------------------------|
| Caryopsis shape details | obovoid, dorsally compressed, brown, glabrous, apex truncate or obtuse | dorsoventrally flattened, truncate apex (illustration); truncate apex (Kahlheber et al. 2014) | truncate apex (Kahlheber et al. 2014)              | elliptic to obovate, dorsally compressed, narrowly oblong in profile                                                                     | club-shape                                    | oblong, dorsally compressed                                | ovate to elliptic, acute apex                      | oblong, isodiametric according to reference                                 |
| Caryopsis size details  | 1–2.5 mm long                                                          | 2.6–3 mm long x 1.4–1.6 mm wide (measured in illustration)                                    | 2.4 mm long x 1 mm wide (measured in illustration) | 1.8–2 mm long, 1 mm wide, 0.6 mm 'thick' (Brunken 1977); L: 1.55–2.07 mm, W: 0.65–0.93; 0.38–0.64 (own measurements, reference material) | very variable, four seed size classes         | 2.5 mm long                                                | smaller than the charred caryopses from Boso-Njafo | 1.5 mm long                                                                 |
| Reference               | Kew Science Plants of the World Online 2020a                           | Plants Database USDA 2020 (illustration); Kahlheber et al. 2014                               | Scher 2008 (illustration); Kahlheber et al. 2014   | Brunken 1977; own measurements (reference material obtained from Kew)                                                                    | Dowling 2011                                  | Kew Science Plants of the World Online 2020b               | Kahlheber et al. 2014                              | Clayton et al. 2006 onwards; Cheavegatti-Gianotto et al. 2011, illustration |

**Table 1** Description and metrical data of *Saccharum officinarum* and *Cenchrus* species related to *C. americanus*

## References

Brunken JN (1977) A systematic study of *Pennisetum* sect. *Pennisetum* (Gramineae). American J Bot 64:161–176

Cheavegatti-Gianotto A, Couto de Abreu HM, Arruda P, Besspalhok Filho JC, Burnquist WL, Creste S, di Ciero L, Aparecido Ferro J, Vargas de Oliveira Figueira A, de Sousa Filgueiras T, de Fátima Grossi-de-Sá M, Cesar Guzzo E, Hoffmann HP, Guimaraes de Andrade Landell M, Macedo N, Matsuoka S, de Castro Reinach F, Romano E, da Silva WJ, de Castro Silva Filho M, Ulian, EC (2011) Sugarcane (*Saccharum x officinarum*): A reference study for the regulation of genetically modified cultivars in Brazil. Trop Plant Biol 4:62–89

Clayton WD, Vorontsova, MS, Harman KT, Williamson H. (2006 onwards) GrassBase – The Online World Grass Flora. <http://www.kew.org/data/grasses-db.html>. Accessed 07 March 2019.

Clayton WD, Renvoize SA (1982) *Pennisetum*. In: Polhill RM (ed) Flora of Tropical East Africa. Part 3. Balkema, Rotterdam, pp. 672–690.

Dowling CA (2011) Marker-assisted verification of hybrids in pearl millet-napiiergrass (*Pennisetum glaucum* [L.] R. BR. X *Pennisetum purpureum* SCHUMACH. MSc Thesis, University of Texas.

Kahlheber S, Eggert MKH, Seidensticker D, Wotzka HP (2014) Pearl millet and other plant remains from the Early Iron Age site of Boso-Njafo (Inner Congo Basin, Democratic Republic of the Congo). *Afr Arch Rev* 31:479–512

Kew Science Plants of the World Online (2020a) <http://www.plantsoftheworldonline.org/taxon/urn:lsid:ipni.org:names:395214-1>, accessed 7 September 2020

Kew Science Plants of the World Online (2020b) <http://www.plantsoftheworldonline.org/taxon/urn:lsid:ipni.org:names:77106056-1>, accessed 7 September 2020

Nunes JD, Azevedo AL, Pereira AV, Paula CM, Campos JM, Léo FJ, Santos VB (2013) DNA elimination in embryogenic development of *Pennisetum glaucum* x *Pennisetum purpureum* (Poaceae) hybrids. *Gen Mol Res* 12:4817–4826

Plants Database USDA (2020) <https://plants.usda.gov/core/profile?symbol=PECL2>, accessed 7 September 2020

Scher JL, Walters DS, Redford AJ (2015) Federal noxious weed disseminules of the U.S., ed. 2.2. California Department of Food and Agriculture, and USDA APHIS Identification Technology Program. Fort Collins, CO. <http://idtools.org/id/fnw>. Accessed 07 March 2019
